# Supplementary material for: Anomalous Water-Sorption Kinetics in ASDs
Source: MDPI journal article supplement (doi:10.3390/pharmaceutics14091897), 2022-09-07
Supplement: s1 [file s1]

# Anomalous Water-sorption Kinetics in ASDs

Dominik Borrmann, Andreas Danzer and Gabriele Sadowski \*

Laboratory of Thermodynamics, Department of Chemical and Biochemical Engineering,  
TU Dortmund University, Emil-Figge-Str. 70, 44227 Dortmund, Germany

\* Correspondence: gabriele.sadowski@tu-dortmund.de; Tel.: +49-231-755-2635

## Elastic modulus

We used dynamic mechanical analysis data taken from Cassu and Felisberti [1] of PVP at 1Hz to obtain the elastic modulus  $E$ . We assume that the glassy modulus of PVP and PVPVA is the same as PVPVA is a copolymer of PVP. The storage modulus  $E'$  was described by Equation (S1), which is the analytical solution of Equation (2) from the main manuscript for a sinusoidal input of the strain  $\epsilon$  that is applied in a dynamic mechanical analysis.

$$E' = E \frac{(\eta/E)^2 t^{-2}}{1 - (\eta/E)^2 t^{-2}} \quad (\text{S1})$$

Here,  $E$  is the elastic modulus,  $\eta$  is the viscosity, and  $t$  is the time determined from the inverse of the frequency of the sinusoidal input of the strain  $\epsilon$ . The description and measurements are displayed in **Error! Reference source not found.**

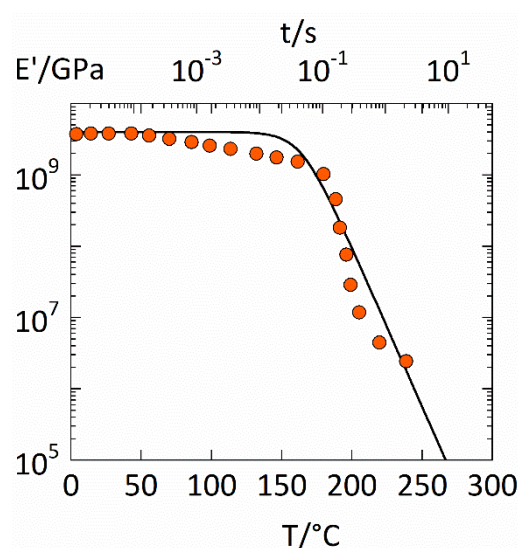

**Figure S1.** Dynamical mechanical analysis result from literature and modeling. Storage moduli at different temperatures were taken from Cassu and Felisberti [1] (circles) at a frequency of 1Hz. The solid lines correspond to the upper time-Axis and show the calculation from Equation (S1).

The storage moduli converge at temperatures below 50°C to a nearly constant value of ~4 GPa. The time-temperature correspondence principle states that the time and temperature dependencies of the storage modulus  $E'$  are the same. This way,  $E'$  at low temperature corresponds to  $E'$  at low times. Thus, the elastic modulus corresponds to the

low-temperature modulus of these polymers, and the elastic modulus  $E = 4\text{GPa}$  was obtained.

#### Modeling of all water sorption curves

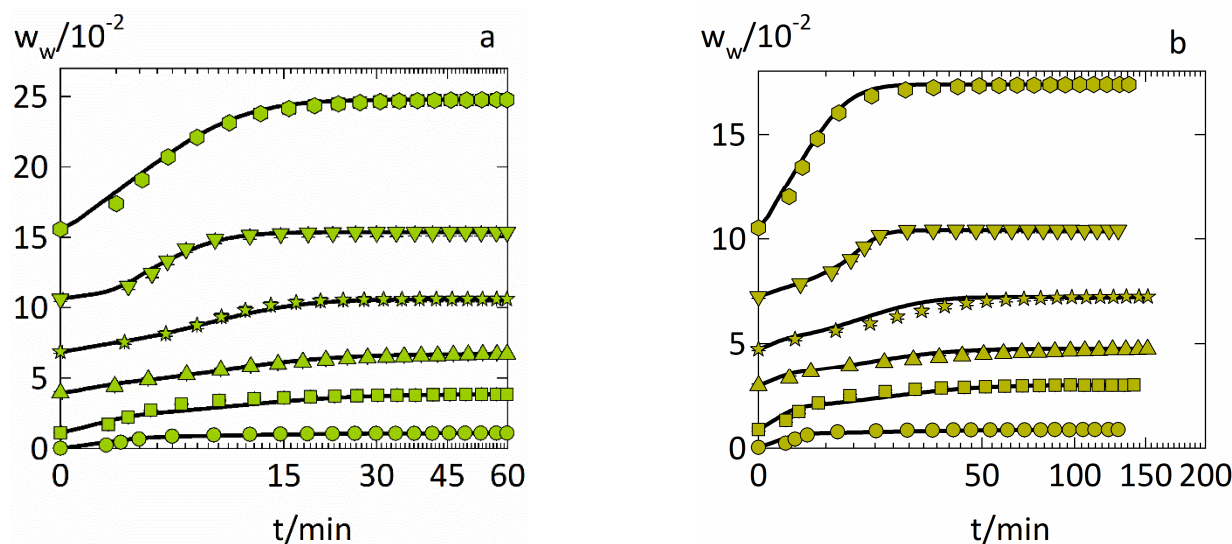

**Figure S2.** Water-sorption kinetics in PVPVA(a) and PVPVA-IND ASD films(b) with a drug load of 0.2 during an RH step 0-0.1 RH(circles), 0.1-0.3 RH (squares), 0.3-0.45 RH (downside triangles), 0.45-0.6 RH (stars), 0.6-0.75 RH (upside triangles) and 0.75-0.9 RH(hexagons) on the right taken from [2],[3]. The solid lines indicate the prediction by the diffusion-relaxation model (Equation (1)) using the combination of WLF equation (Equation (8)) and Arrhenius equation (Equation (9)) of the main manuscript .

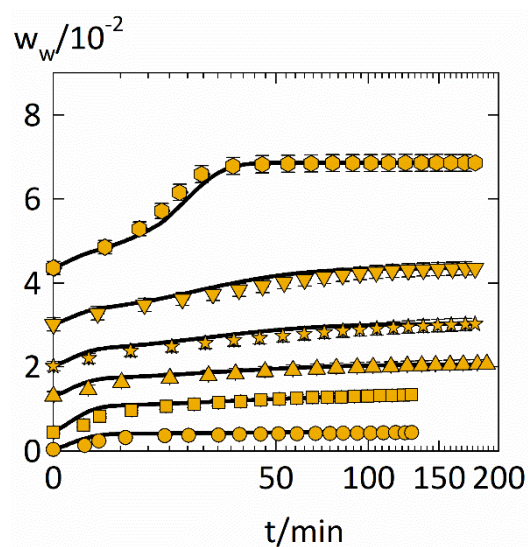

**Figure S3.** Water-sorption kinetics in PVPVA-IND ASD films with a drug load of 0.5 during an RH step 0-0.1 RH(circles), 0.1-0.3 RH (squares), 0.3-0.45 RH (downside triangles), 0.45-0.6 RH (stars), 0.6-0.75 RH (upside triangles) and 0.75-0.9 RH(hexagons) with data taken from[3]. The solid lines indicate the prediction via the diffusion-relaxation model (Equation (1)) using the combination of (Equation (8)) and (Equation (9)).

## References

1. Cassu, S.N.; Felisberti, M.I. Poly(Vinyl Alcohol) and Poly(Vinylpyrrolidone) Blends: 2. Study of Relaxations by Dynamic Mechanical Analysis. *Polymer (Guildf)*. **1999**, *40*, 4845–4851, doi:10.1016/S0032-3861(98)00703-4.
2. Borrmann, D.; Danzer, A.; Sadowski, G. Water Sorption in Glassy Polyvinylpyrrolidone-Based Polymers. *Membranes (Basel)*. **2022**, *12*, 434, doi:10.3390/membranes12040434.
3. Borrmann, D.; Danzer, A.; Sadowski, G. Predicting the Water Sorption in ASDs. *Pharmaceutics* **2022**, *14*, 1181, doi:10.3390/pharmaceutics14061181.
